# Supplementary material for: MiRNA-206 suppresses PGE2-induced colorectal cancer cell proliferation, migration, and invasion by targetting TM4SF1
Source: PubMed Central journal article supplement (PMC6146292; doi:10.1042/bsr20180664), 2018-09-19
Supplement: bsr20180664_Supp1.pdf [file bsr20180664_Supp1.pdf]

# Supplementary figure 1

## A

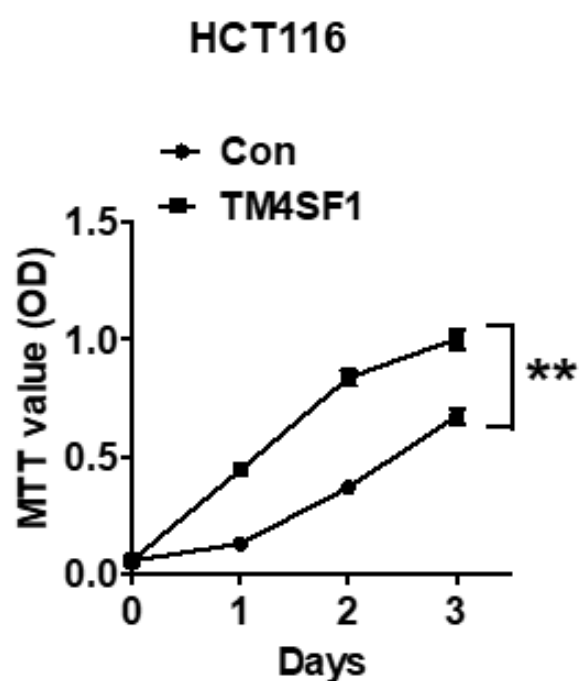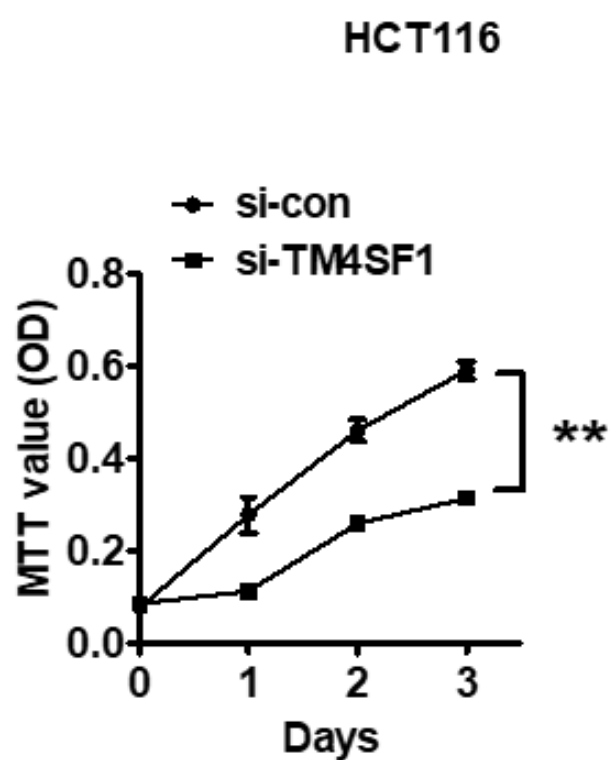

## B

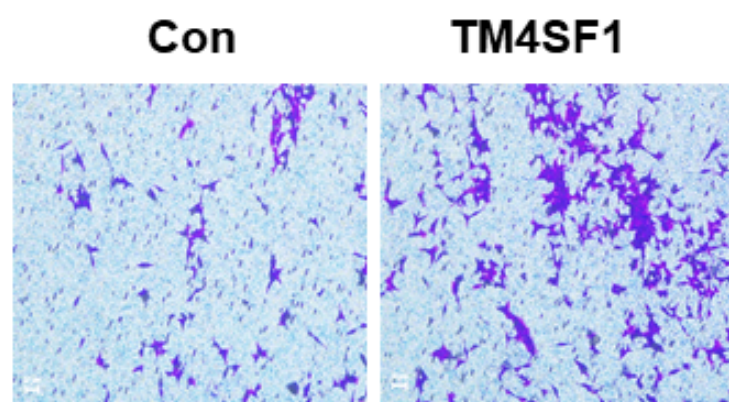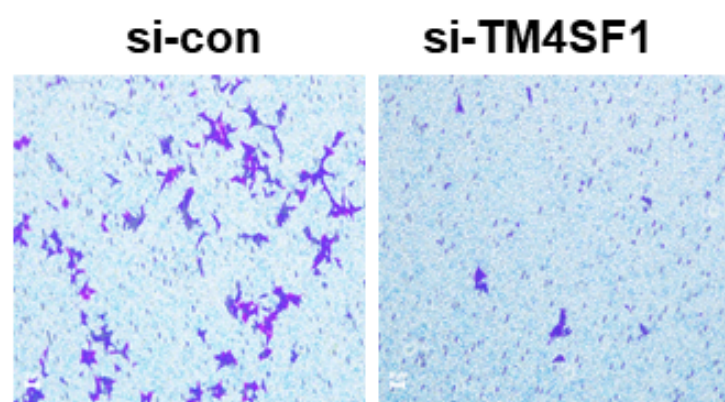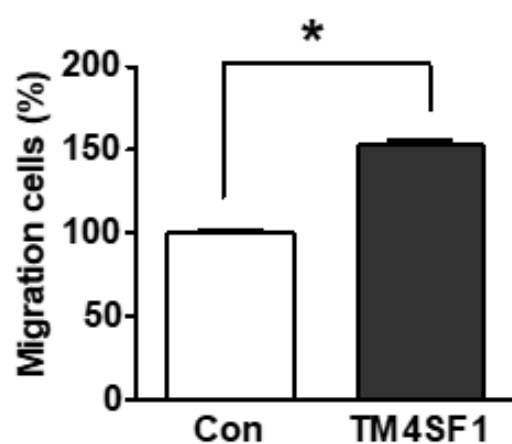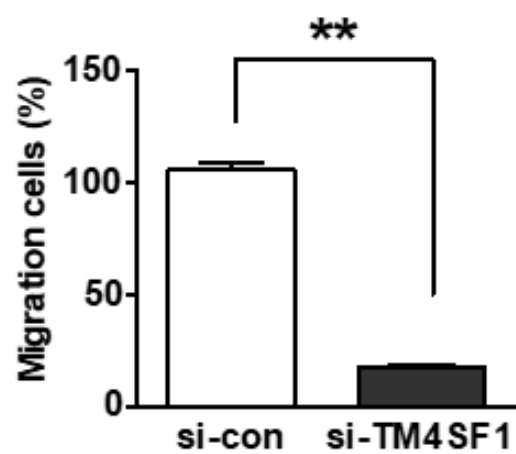

# Supplementary figure 1

C

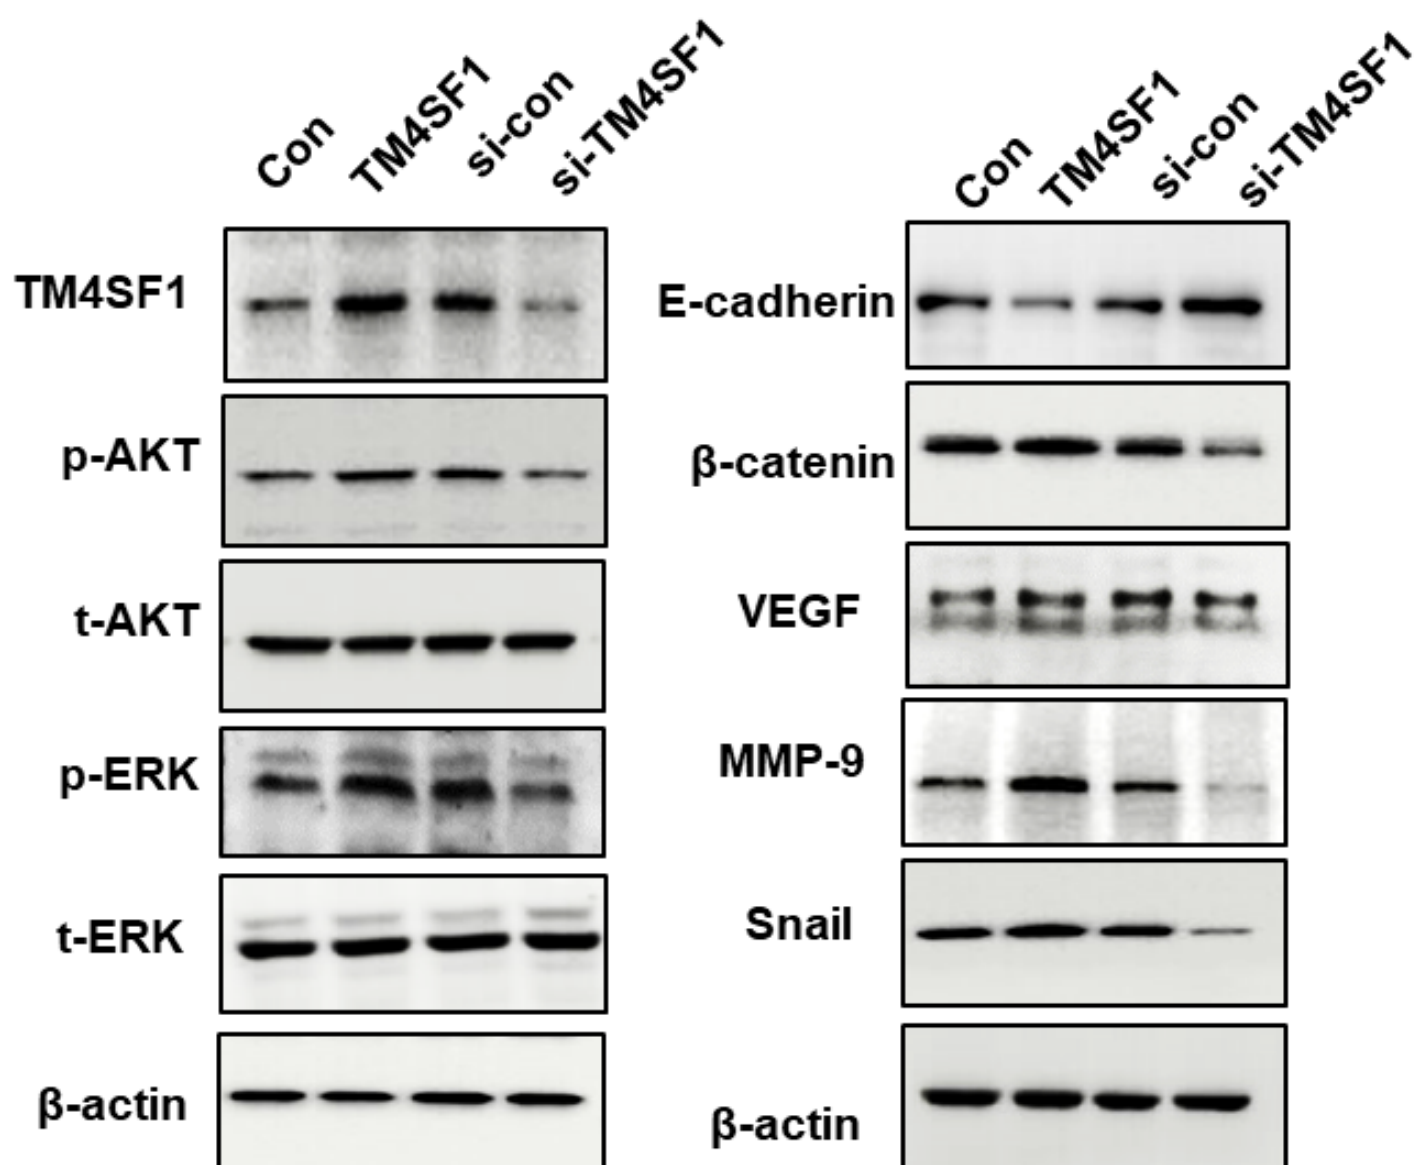

## Supplementary figure 2

**A**

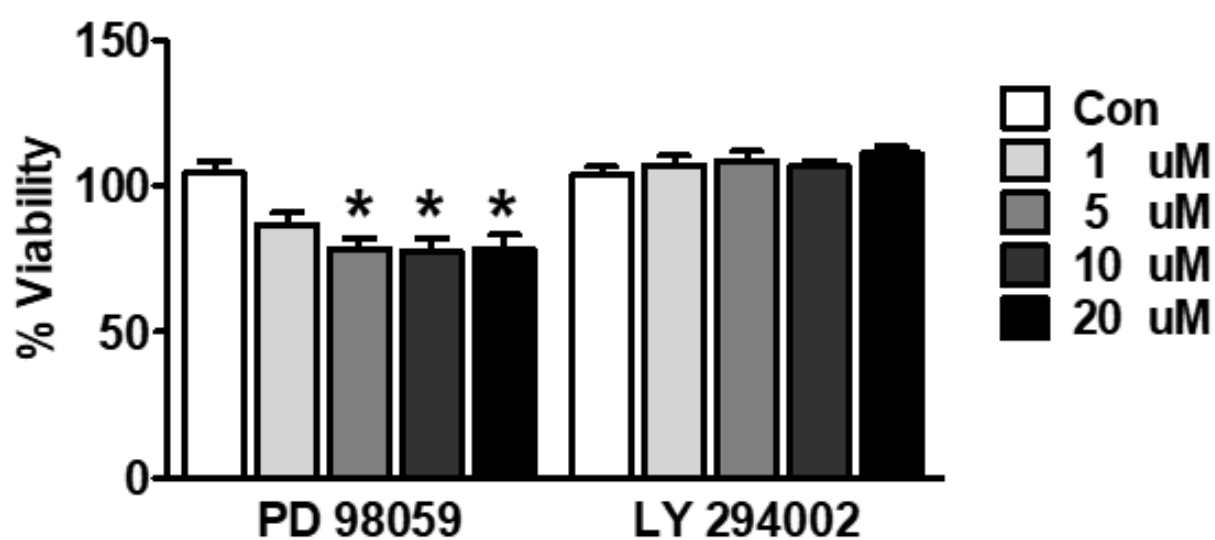

**B**

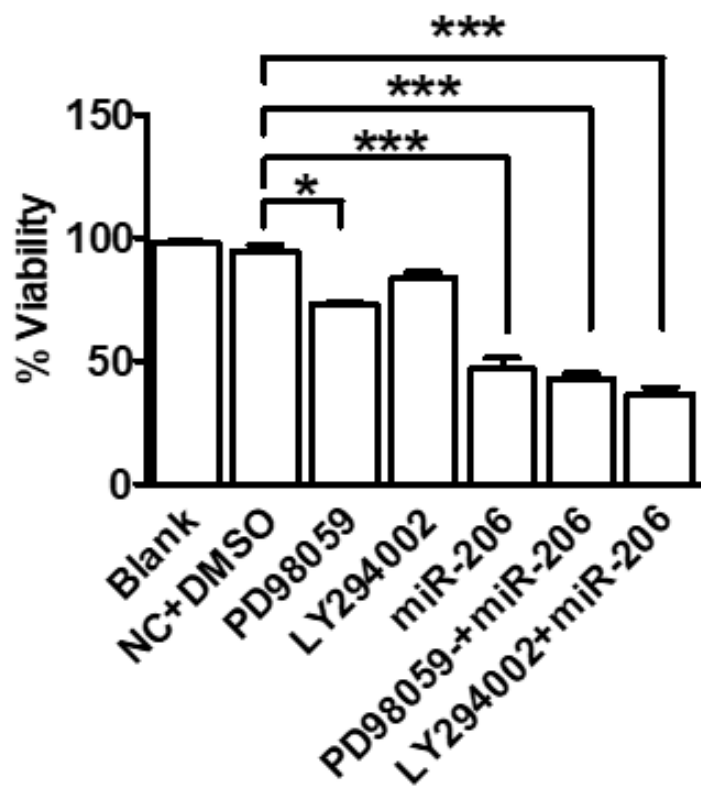

## Supplementary figure 2

C

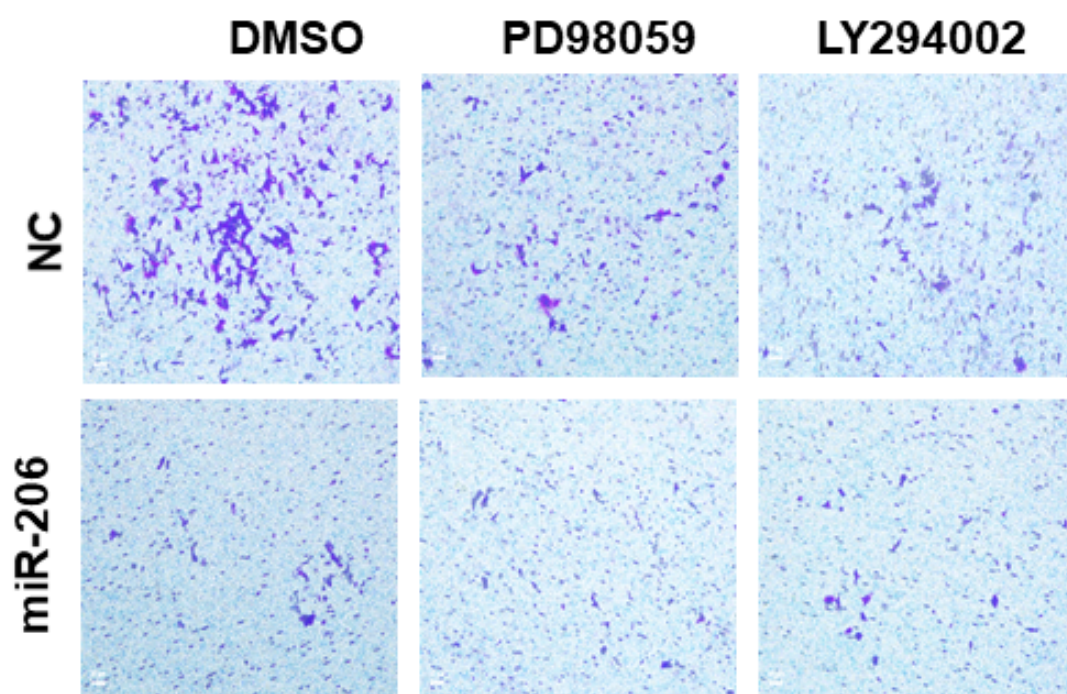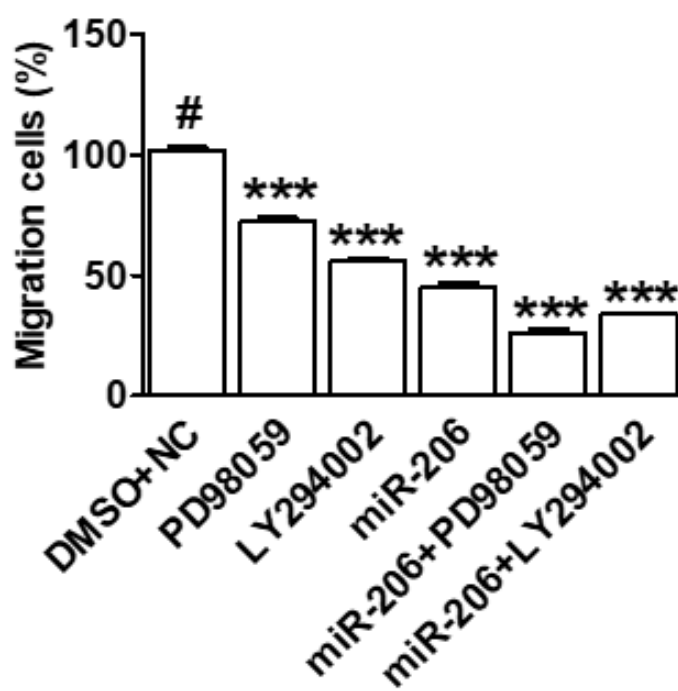

# Supplementary figure 2

D

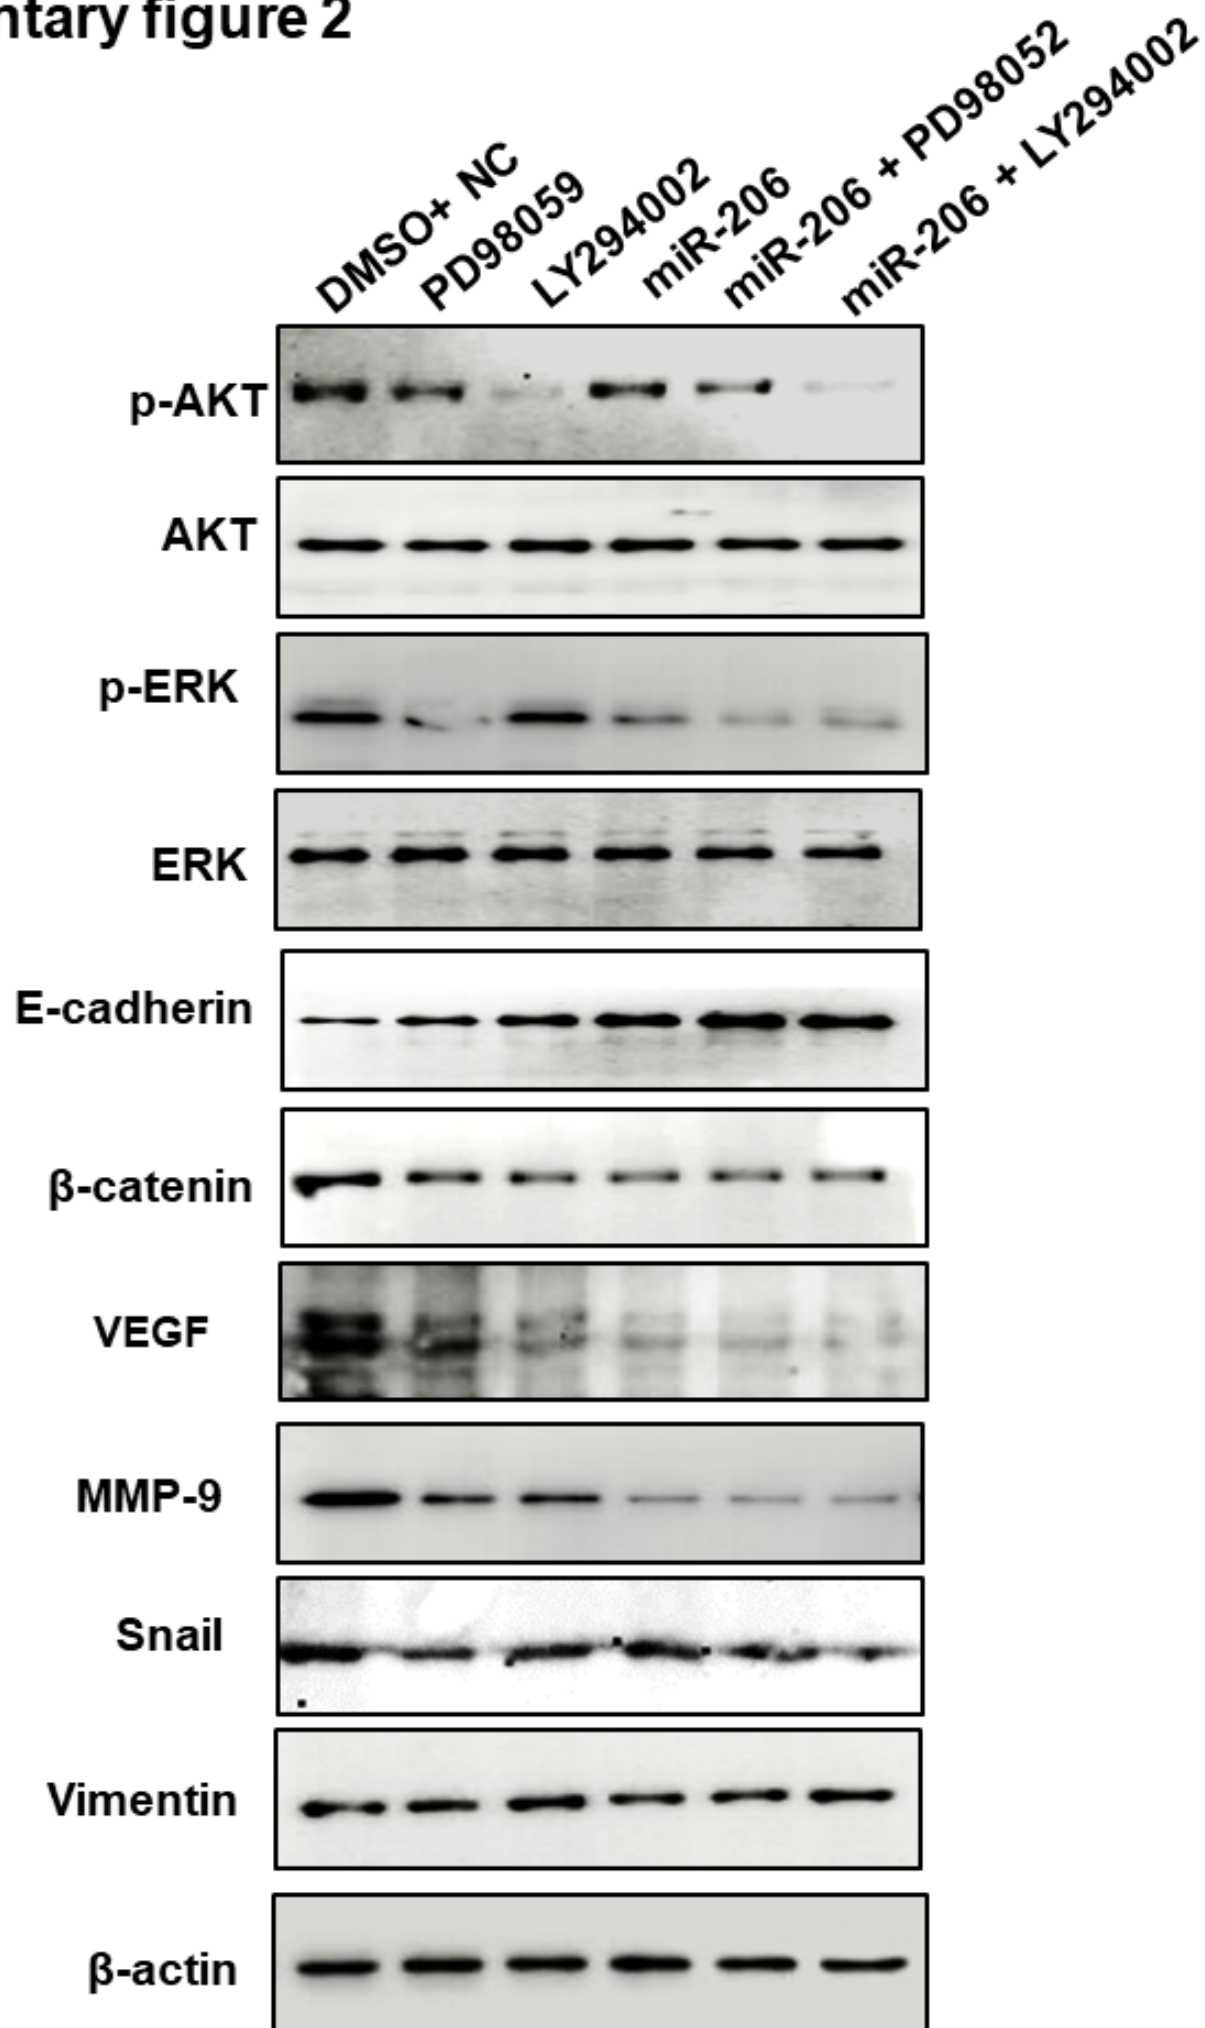

Supplementary figure 1.

**TM4SF1 promotes proliferation and migration of colon cancer cells.**

(A) HCT116 cells were transfected with TM4SF1 plasmid or si-TM4SF1 for 0, 1, 2, 3 days. The cell proliferation was determined using MTT assay. (B) The transwell migration assay was performed on HCT116 cells transfected with TM4SF1 plasmid or si-TM4SF1. (C) Western blot analysis was used to measure the protein levels of EMT markers or p-AKT and p-ERK signaling pathway in HCT116 cells.  $\beta$ -actin was detected as a loading control. \*  $p < 0.05$ , \*\*  $p < 0.01$ .

Supplementary figure 2.

**miR-206 decreases PGE2-induced cell proliferation, migration, and EMT process through p-AKT and p-ERK pathway on colon cancer cells.**

(A) HCT116 cells were treated with PD98059 (MEK inhibitor) or LY294002 (PI3K inhibitor) under various concentration (0, 1, 5, 10, 20  $\mu$ M) for 24 h. The cell viability was determined by MTT assay. \*  $p < 0.05$  compared with con (0  $\mu$ M). HCT116 cells were transfected with miR-206 for 48 h and treated with PD98059 (5  $\mu$ M) or LY294002 (10  $\mu$ M) for 24 h, and then PGE2 was treated for 12 h, and then determined using MTT assay (B) and transwell migration assay (C). (D) The protein levels of p-AKT, p-ERK, E-cadherin,  $\beta$ -catenin, VEGF, MMP-9, Snail and Vimentin in HCT116 cells were detected by performing immunoblotting. The data are presented as mean  $\pm$  S. D. of three independent experiments.
